# Supplementary material for: Does load management using the acute:chronic workload ratio prevent health problems? A cluster randomised trial of 482 elite youth footballers of both sexes
Source: HighWire-hosted journal article supplement (doi:10.1136/bjsports-2020-103003), 2020-10-09
Supplement: bjsports-2020-103003supp002_data_supplement.pdf [file bjsports-2020-103003supp002_data_supplement.pdf]

*Supplementary Table 1 OSTRC Questionnaire on health problems 2***Question 1 -Participation**

Have you had any difficulties participating in normal training and competition due to injury, illness or other health problems during the past week?

1. Full participation without health problems
2. Full participation, but with injury/illness
3. Reduced participation due to injury/illness
4. Cannot participate due to injury/illness

**Question 2 - Training volume**

To what extent have you reduced your training volume due to injury, illness or other health problems during the past week?

1. No reduction
2. To a minor extent
3. To a moderate extent
4. To a major extent
5. Cannot participate at all

**Question 3- Performance**

To what extent has injury, illness or other health problems affected your performance during the past week?

1. No reduction
2. To a minor extent
3. To a moderate extent
4. To a major extent
5. Cannot participate at all

**Question 4 - Symptoms**

To what extent have you experienced symptoms/health complaints during the past week?

1. No symptoms/health complaints
2. To a mild extent
3. To a moderate extent
4. To a severe extent
